# Supplementary material
Source: ML conference proceedings conference paper supplement (https://www.ecva.net/papers/eccv_2020/papers_ECCV/html/123710579_ECCV_2020_paper.php)
Supplement: Supplementary file 2 [file 123710579-supp.zip]

Archive with 4 entries (3 files):
- 5491-supp/
- 5491-supp/5491-supp.mp4
- 5491-supp/5491-supp.pdf
- 5491-supp/README.txt
