# Supplementary material
Source: ML conference proceedings conference paper supplement (https://www.ecva.net/papers/eccv_2020/papers_ECCV/html/123710579_ECCV_2020_paper.php)
Supplement: Supplementary file 2 [file 123710579-supp.zip › 5491-supp/README.txt]

The video "5491-supp.mp4" can be open using VLC media player.
Download VLC via: https://www.videolan.org/vlc/index.html
